# Supplementary material for: Exploration of HIV-1 fusion peptide–antibody VRC34.01 binding reveals fundamental neutralization sites
Source: Royal Society of Chemistry journal article supplement (doi:10.1039/c9cp02909e), 2019-01-01
Supplement: c9cp02909e1.pdf [file c9cp02909e1.pdf]

**Supporting Information for:**

**Exploration of HIV-1 Fusion peptide-Antibody VRC34.01**

**Binding Reveals Fundamental Neutralization Sites**

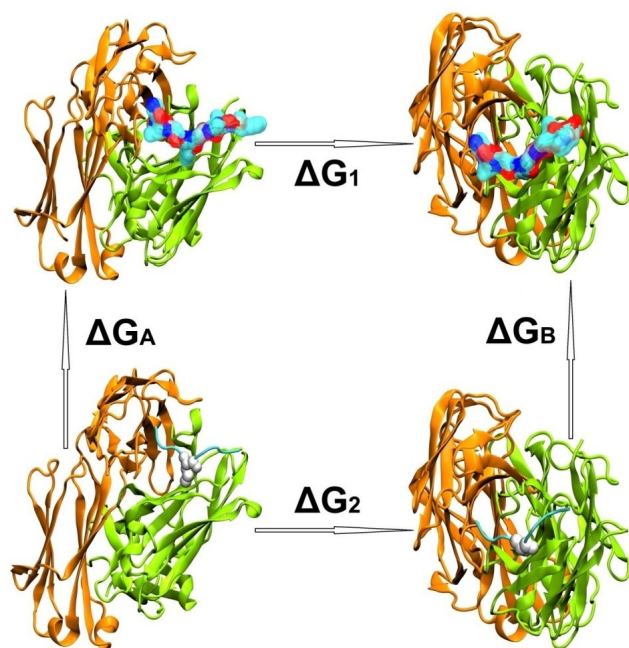

**Figure S1.** An illustration of the thermodynamic cycle for computing  $\Delta\Delta G$  for mutating a residue from Ile to Ala (I515A). Fusion peptide is shown in cyan, while heavy (green) and light (orange) antibody chains are shown in cartoon.
